# Supplementary material for: Three-dimensional carbon foam/N-doped graphene@MoS2hybrid nanostructures as effective electrocatalysts for the hydrogen evolution reaction
Source: Royal Society of Chemistry journal article supplement (doi:10.1039/c6ta03458f), 2016-01-01
Supplement: c6ta03458f1.pdf [file c6ta03458f1.pdf]

## Electronic Supplementary Information

### Three-Dimensional Carbon Foam/N-doped Graphene@MoS<sub>2</sub> Hybrid Nanostructures as Effective Electrocatalysts for Hydrogen Evolution Reaction

Seung-Keun Park,<sup>a,b</sup> † Dong Young Chung,<sup>c,d,†</sup> Dongjin Ko,<sup>a</sup> Yung-Eun Sung <sup>\*c,d</sup>, Yuanzhe Piao<sup>\*a,b,c</sup>

<sup>a</sup>Program in Nano Science and Technology, Graduate School of Convergence Science and Technology, Seoul National University, 145 Gwanggyo-ro, Yeongtong-gu, Suwon-si, Gyeonggi-do, 443-270, Republic of Korea. Fax: +82-31-8889148; Tel: +82-31-8889141; E-mail: [parkat9@snu.ac.kr](mailto:parkat9@snu.ac.kr)

<sup>b</sup>Advanced Institutes of Convergence Technology, 145 Gwanggyo-ro, Yeongtong-gu, Suwon-si, Gyeonggi-do, 443-270, Republic of Korea.

<sup>c</sup>Center for Nanoparticle Research, Institute for Basic Science (IBS), Seoul 151-747, South Korea. E-mail: [ysung@snu.ac.kr](mailto:ysung@snu.ac.kr)

<sup>d</sup>School of Chemical and Biological Engineering, Seoul National University, Seoul 151-747, South Korea

† These authors contributed equally to this work

## **Experiment**

### **Preparation of carbon foam/N-doped graphene (CF-NG) composites**

First, graphene oxide (GO) was synthesized by a modified Hummers method. In a typical synthesis process for CF-NG composites, a certain amount of GO was dispersed in 100 ml of distilled (DI) water. After one hour of sonication, a piece of melamine foam (MF) block was fully immersed into the homogeneous GO solution for a few seconds. Then, the MF block was removed from the dispersion and dried naturally at room temperature. During this process, the GO sheets were deposited on the MF framework. For both carbonization of the MF and reduction of GO, the brown coloured composite foam was heated at 700 °C for 2 h under Ar atmosphere, and finally, the black CF-NG monolith was obtained. With different concentrations of GO solution, such as 1, 3, and 6 mg ml<sup>-1</sup>, CF/NG composites with different graphene loading densities were obtained. The corresponding composites are designated as CF-NG-1, CF-NG-3, and CF-NG-6, respectively.

### **Preparation of CF-NG@MoS<sub>2</sub> composites**

To grow MoS<sub>2</sub> catalysts on the CF-NG surfaces, ammonium thiomolybdate (50 wt % of CF-NG composites) dispersed in *N,N*-dimethylformamide (DMF) was added to the CF-NG monolith using a pipette and dried in a vacuum oven at 70 °C for 2 h. The MoS<sub>2</sub> layers were formed after subsequent thermal treatment at 150 °C in Ar/H<sub>2</sub> (95 : 5 v/v %) atmosphere for 30 min. After cooling to room temperature, the obtained CF-NG@MoS<sub>2</sub> block was washed with DI water and ethanol.

### **Material characterization**

The morphologies and shapes of all samples were observed by field-emission scanning electron microscopy (FE-SEM; Hitachi S-4800). Transmission electron microscopy (TEM) images were obtained using a JEOL JEM-2010 instrument. X-ray photoelectron spectroscopy (XPS, SIGMA PROBE, ThermoFisher Scientific, UK, Al K $\alpha$  (1486.6 eV)) was conducted to obtain the chemical information of samples. XPS curve fitting was conducted by the XPSPEAK41 software with Shirley background. X-ray diffraction (XRD) measurements were performed using a Rigaku system (D/MAX 2500) with Cu K $\alpha$  ( $\lambda$  = 0.15418 nm) radiation (40 kV, 200 mA). For thermogravimetric analysis (TGA), a TGA/DSC 1 (Mettler Toledo) system was used (heating rate: 10 °C min<sup>-1</sup> to 700 °C in air). Element Analyzer (TRSMCHNSC-6280TRSM) was used to confirm the element contents in samples.

### **Electrochemical measurements**

The prepared samples (5 mg) were mixed with Nafion (Nafion® perfluorinated resin solution, 5 wt% in a mixture of lower aliphatic alcohols and water, contains 45% water, Aldrich, 15 wt%) as a binder and 2-propanol. The Pt/C result was measured using commercial 20 wt% (Pt loading mass, Johnson Matthey). 7  $\mu$ L of the solution was deposited on a rotating ring disk electrode (disk area: 0.2475 cm<sup>2</sup>, PINE). The catalyst loading was 80  $\mu$ g. Electrochemical measurements were conducted using an Autolab potentiostat (PGSTAT) in a standard three-electrode cell with a glassy carbon counter electrode and a saturated calomel electrode as the reference electrode. All the potentials were measured with respect to the reversible hydrogen electrode (RHE) with a H<sub>2</sub> oxidation/evolution potential. The HER was measured in 0.5 M H<sub>2</sub>SO<sub>4</sub> electrolyte at 298 K. Electrochemical double layer capacitance was measured at

various scan rates (2, 5, 8, 10, and 15 mV s<sup>-1</sup>). EIS was measured under 0.5 M H<sub>2</sub>SO<sub>4</sub> electrolyte at -0.15 V (vs. RHE) with the frequency range of 10000 Hz to 50 mHz, 10 mV amplitude.

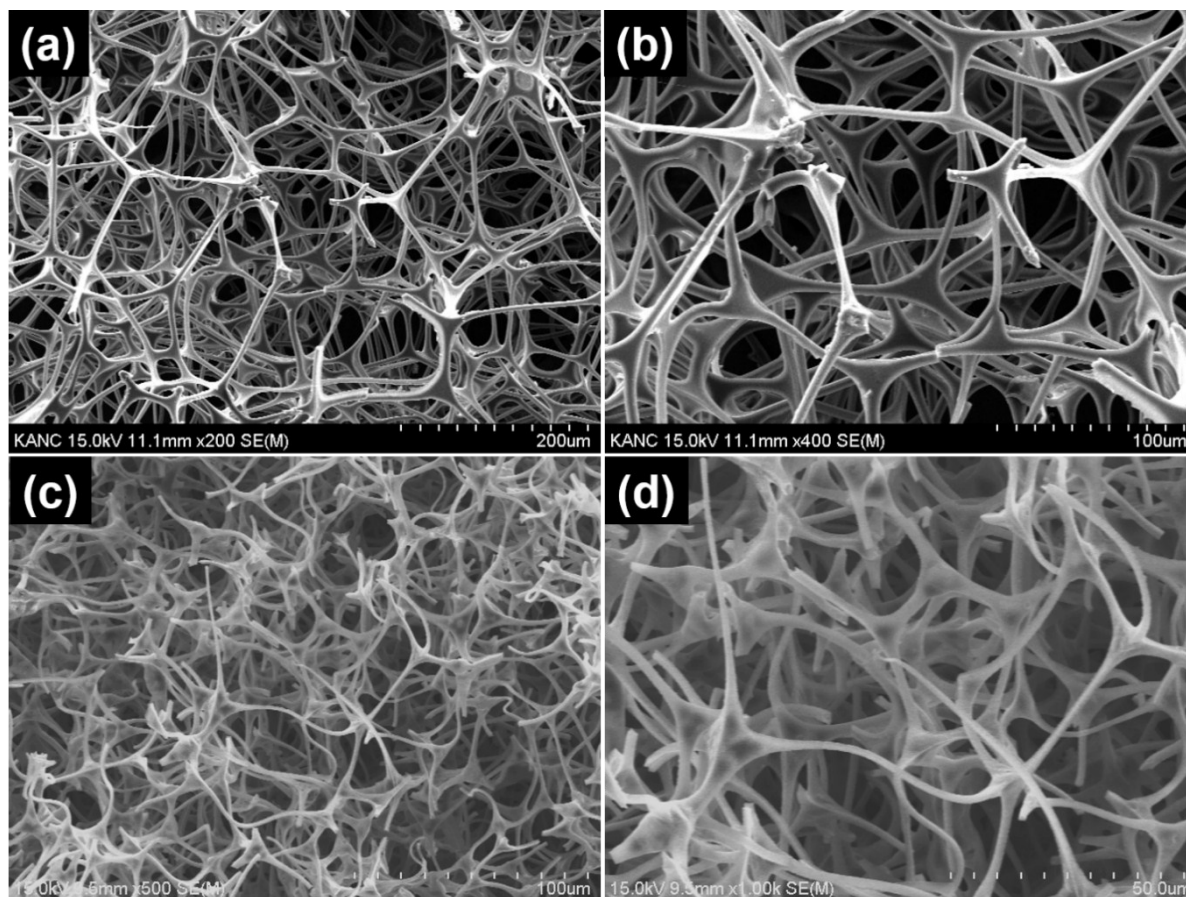

**Fig. S1** SEM images of (a, b) bare MF and (c, d) CF monolith.

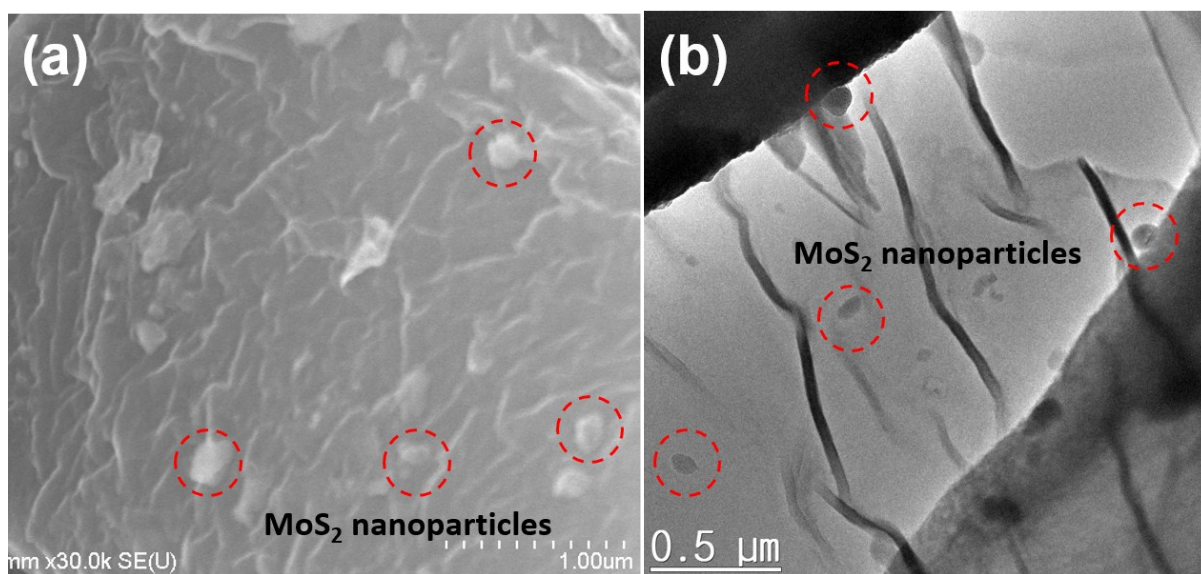

**Fig. S2** High magnification of SEM and TEM images of CF-NG@MoS<sub>2</sub> composite (red circles: MoS<sub>2</sub> nanoparticles).

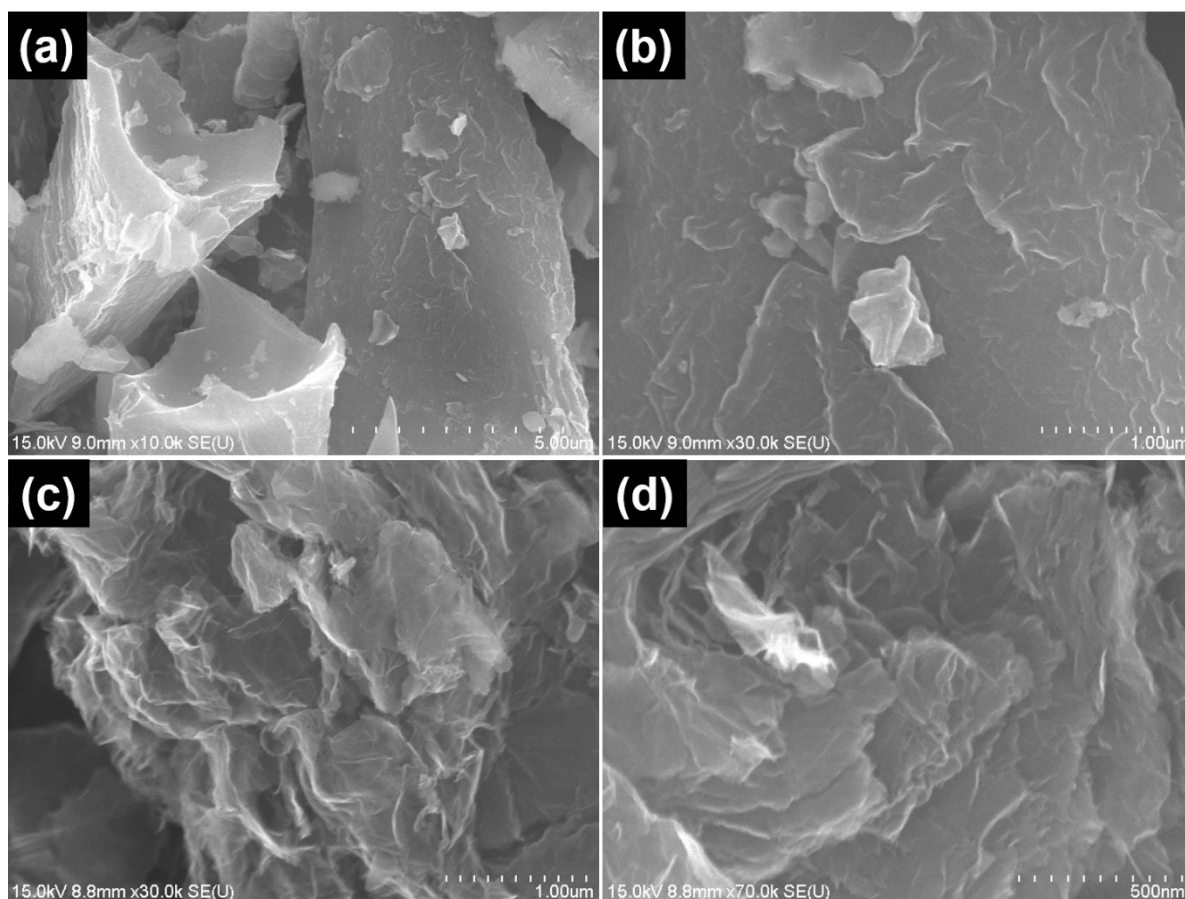

**Fig. S3** SEM images of (a, b) CF@MoS<sub>2</sub> and (c, d) G@MoS<sub>2</sub> composites.

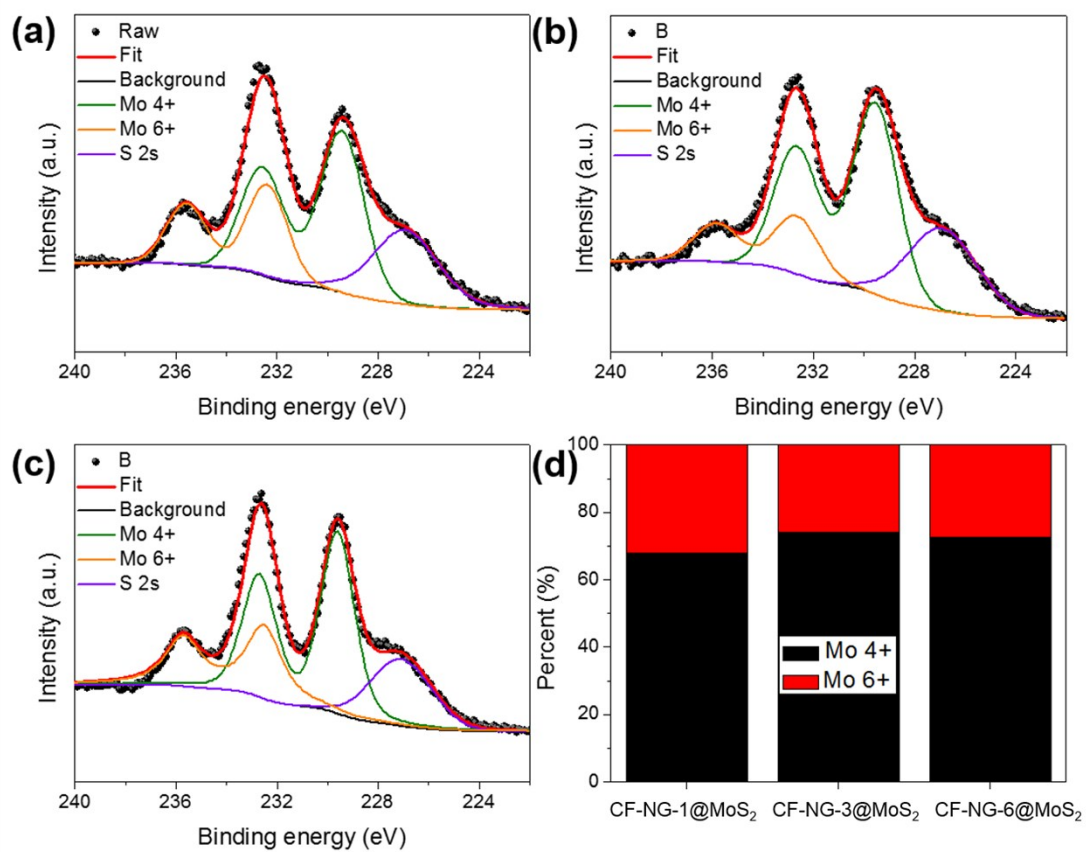

**Fig. S4.** Mo 3d XPS analysis of samples (a) CF-NG-1@MoS<sub>2</sub>, (b) CF-NG-3@MoS<sub>2</sub>, (c) CF-NG-6@MoS<sub>2</sub> and summary of fitting results.

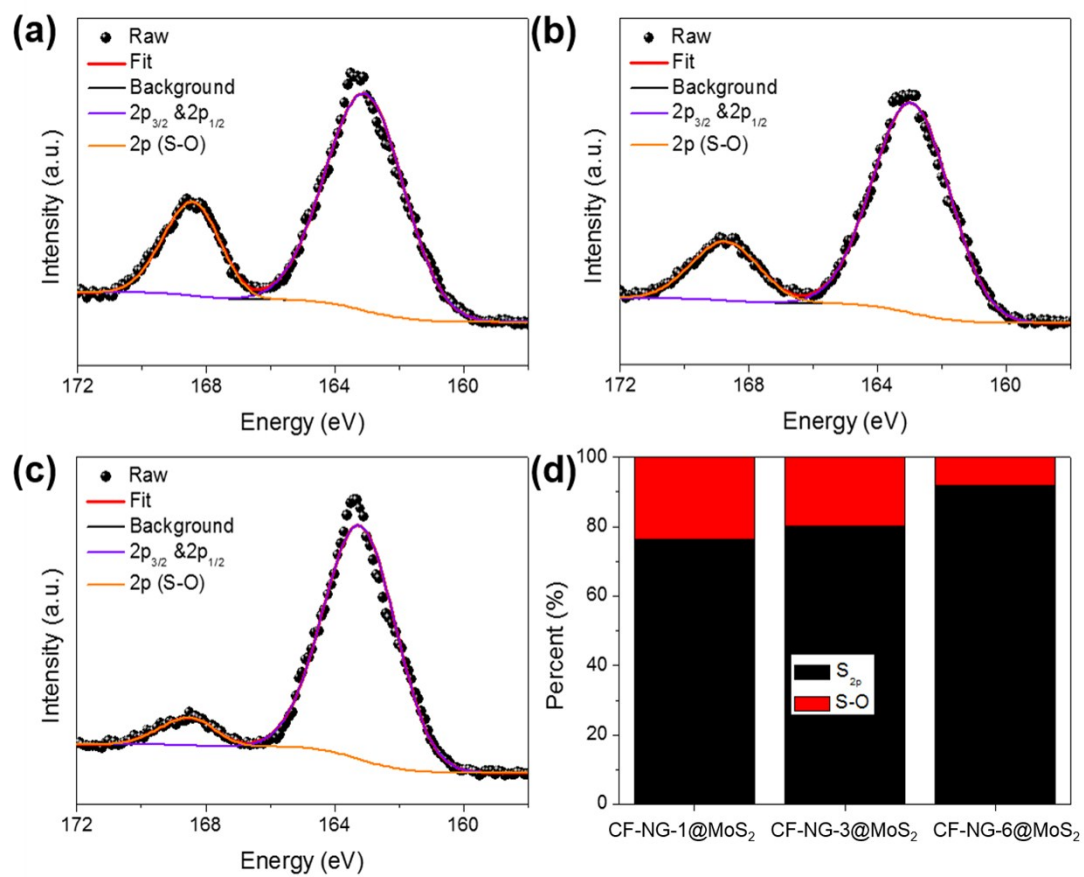

**Fig. S5.** S 2p XPS analysis of samples (a) CF-NG-1@MoS<sub>2</sub>, (b) CF-NG-3@MoS<sub>2</sub>, (c) CF-NG-6@MoS<sub>2</sub> and summary of fitting results.

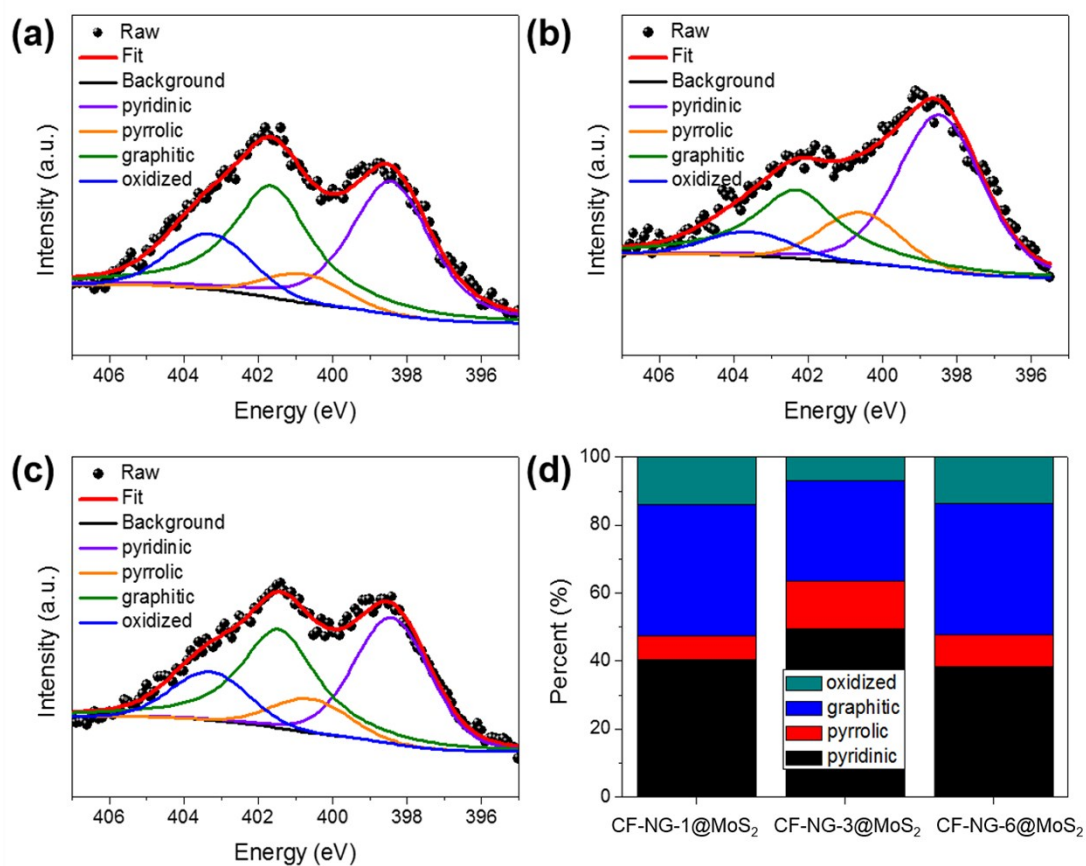

**Fig. S6.** N 1s XPS analysis of samples (a) CF-NG-1@MoS<sub>2</sub>, (b) CF-NG-3@MoS<sub>2</sub>, (c) CF-NG-6@MoS<sub>2</sub> and summary of fitting results.

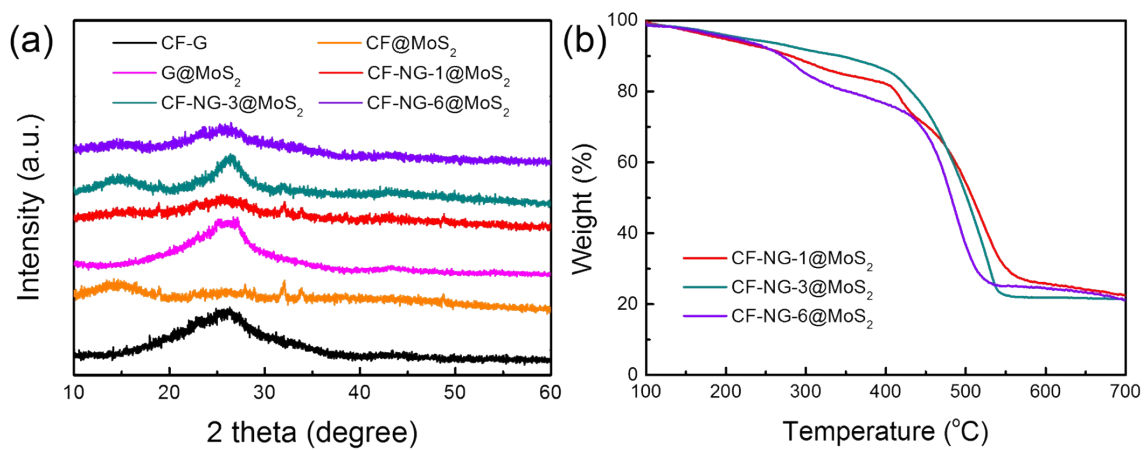

**Fig. S7** (a) XRD patterns of all samples and (b) TGA curves of CF-NG@MoS<sub>2</sub> samples.

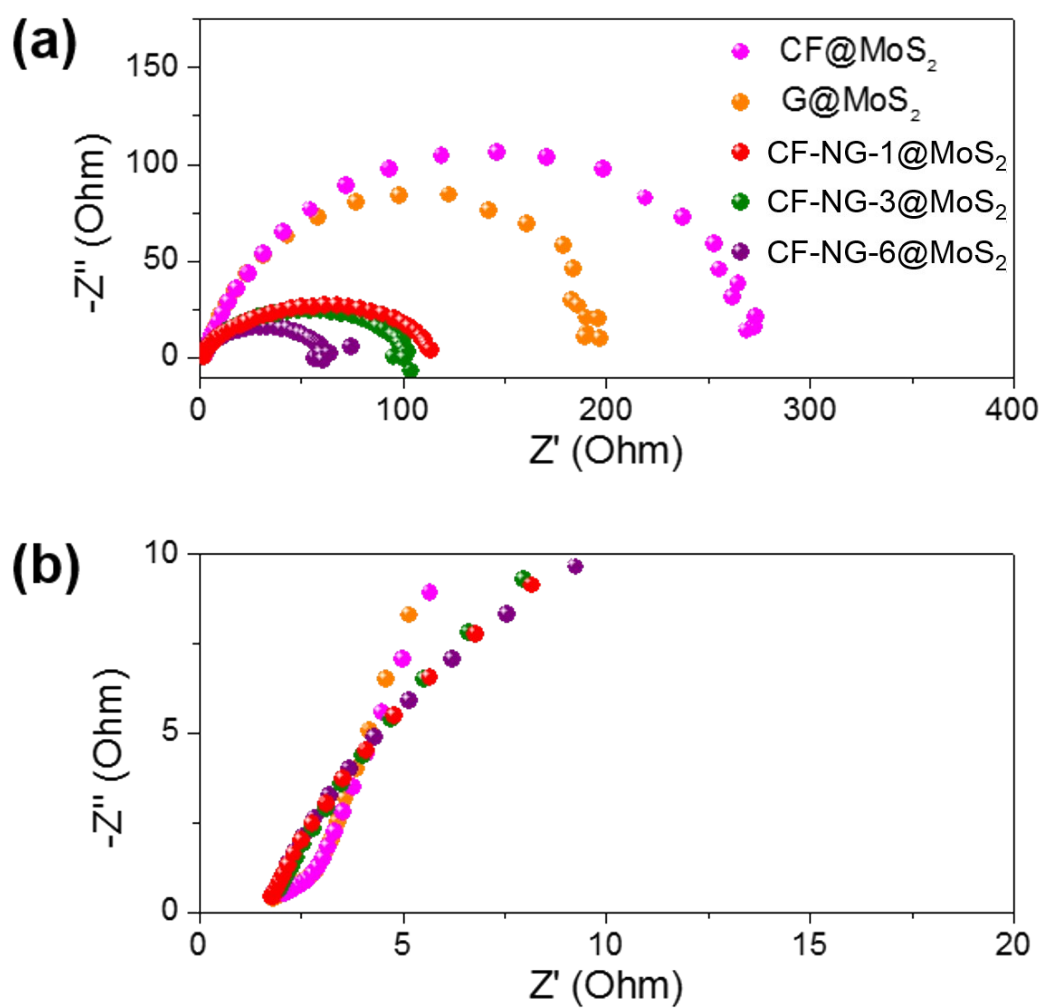

**Fig. S8** (a) Nyquist plots of electrochemical impedance spectroscopy (EIS) results for MoS<sub>2</sub> based samples (b) enlarged image for comparing series resistance.

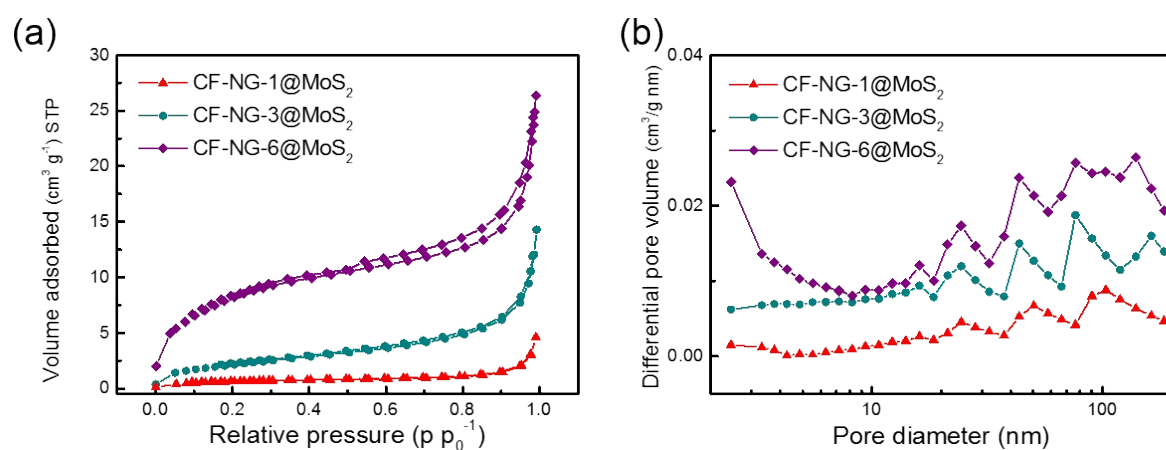

**Fig. S9** (a) N<sub>2</sub> adsorption and desorption isotherm and (b) pore size distribution of the CF-NG@MoS<sub>2</sub> composites.

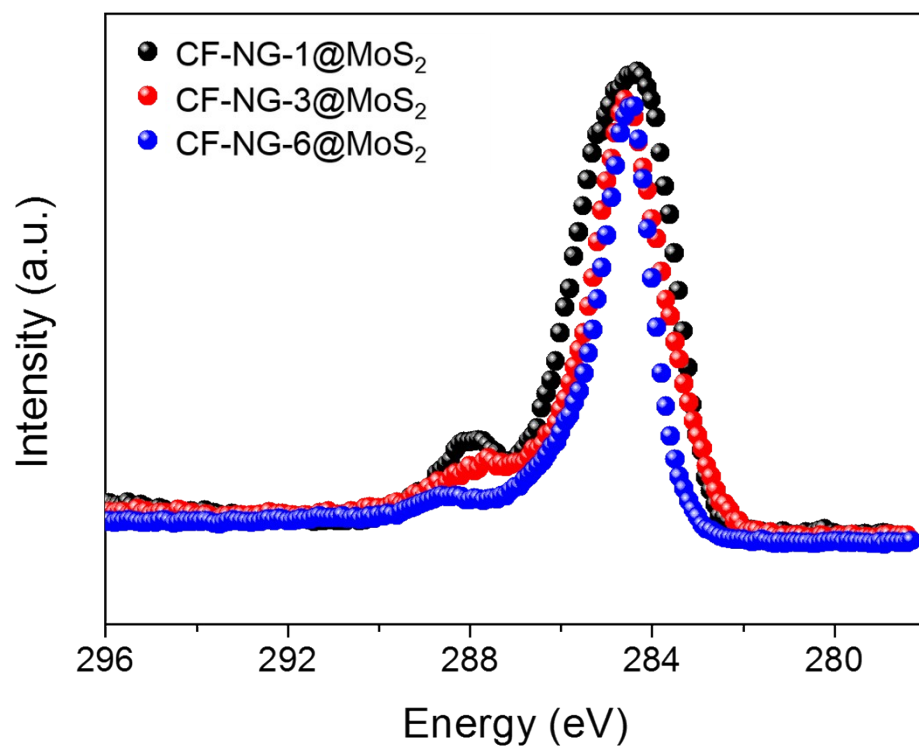

**Fig. S10** C 1s regions of the CF-NG@MoS<sub>2</sub> composites XPS spectrum.

**Table S1.** Composition (wt %) of the CF-NG and CF-NG-6@MoS<sub>2</sub> resulted from Elemental Analyzer.

| Sample                   | C     | H    | N     | S     |
|--------------------------|-------|------|-------|-------|
| CF-NG                    | 60.62 | 0.84 | 16.49 | 7.3   |
| CF-NG-6@MoS <sub>2</sub> | 31.35 | 1.39 | 5.28  | 24.16 |

**Table S2.** Comparison of the HER performance of some reported MoS<sub>2</sub>-based catalysts in the literature.

| Catalysts                        | Tafel slope<br>(mV dec <sup>-1</sup> ) | Current density                              | References |
|----------------------------------|----------------------------------------|----------------------------------------------|------------|
|                                  |                                        | (mA cm <sup>-2</sup> )<br>*η = overpotential |            |
| CF-NG@MoS <sub>2</sub>           | 53                                     | 10 (at η= 171 mV)                            | Our work   |
| MoS <sub>2</sub> QD/rGO          | 63                                     | 10 (at η= 64 mV)                             | [s1]       |
| MoS <sub>2</sub> /CNT/Graphene   | 100                                    | 10 (at η= 255 mV)                            | [s2]       |
| MWCNT@Cu@MoS <sub>2</sub>        | 62                                     | 85.5 (at η= 300 mV)                          | [s3]       |
| MoS <sub>2</sub> /Carbon aerogel | 59                                     | 9.68 (at η= 200 mV)                          | [s4]       |
| Graphene/MoS <sub>2</sub> flower | 95                                     | 30 (at η= 300 mV)                            | [s5]       |

## Reference

- [s1] F. Li, J. Li, Z. Cao, X. Q. Lin, X. Z. Li, Y. Y. Fang, X. C. An, Y. Fu, J. Jin and R. Li, *J. Mater. Chem. A*, 2015, **3**, 21772-21778.
- [s2] D. H. Youn, S. Han, J. Y. Kim, J. Y. Kim, H. Park, S. H. Choi and J. S. Lee, *ACS Nano*, 2014, **8**, 5164-5173.
- [s3] F. Li, J. Li, X. Q. Lin, X. Z. Li, Y. Y. Fang, L. X. Jiao, X. C. An, Y. Fu, J. Jin and R. Li, *J. Power Sources*, 2015, **300**, 301-308.

- [s4] Y. F. Zhang, L. Z. Zuo, Y. P. Huang, L. S. Zhang, F. L. Lai, W. Fan and T. X. Liu, *ACS Sustain. Chem. Eng.*, 2015, **3**, 3140-3148.
- [s5] C. B. Ma, X. Y. Qi, B. Chen, S. Y. Bao, Z. Y. Yin, X. J. Wu, Z. M. Luo, J. Wei, H. L. Zhang and H. Zhang, *Nanoscale*, 2014, **6**, 5624-5629.
